# Supplementary material for: Highly active copper catalyst obtained through rapid MOF decomposition
Source: Royal Society of Chemistry journal article supplement (doi:10.1039/c8qi01217b), 2019-01-01
Supplement: c8qi01217b1.pdf [file c8qi01217b1.pdf]

Supporting Information for:

# Highly active copper catalyst obtained through rapid MOF decomposition

*Anh H. T. Nguyen-Sorenson,<sup>a</sup> Clifton M. Anderson,<sup>a</sup> Santosh K. Balijepalli,<sup>a</sup> Kyle A. McDonald,<sup>b</sup> Adam J. Matzger,<sup>b</sup> and Kara J. Stowers<sup>\*a</sup>*

## Corresponding Author

\*Address correspondence to [kstowers@chem.byu.edu](mailto:kstowers@chem.byu.edu)

Department of Chemistry and Biochemistry, Brigham Young University, C100 Benson Building, Provo, Utah, USA 84602

Department of Chemistry, University of Michigan, 930 N. University, Ann Arbor MI, USA 48109-1055

## Table of contents

### Supplementary Figures and Tables

**Figure S1.** TEM-EDX images of **a-Cu@C** (Ni peaks are from TEM grid)

**Table S1.** Comparison of the catalytic activity for the aerobic oxidation of benzyl alcohol between different Cu-based catalysts

**Table S2.** Comparison of the catalytic activity for the reduction of nitrobenzene between different catalysts

**Table S3.** Comparison of the catalytic activity for the N-arylation between different Cu-based catalysts

### Supplementary information

Energy dispersive X-ray (EDX) analysis indicates the presence of carbon and copper components in the Cu@C nanocomposite (Fig. S1).

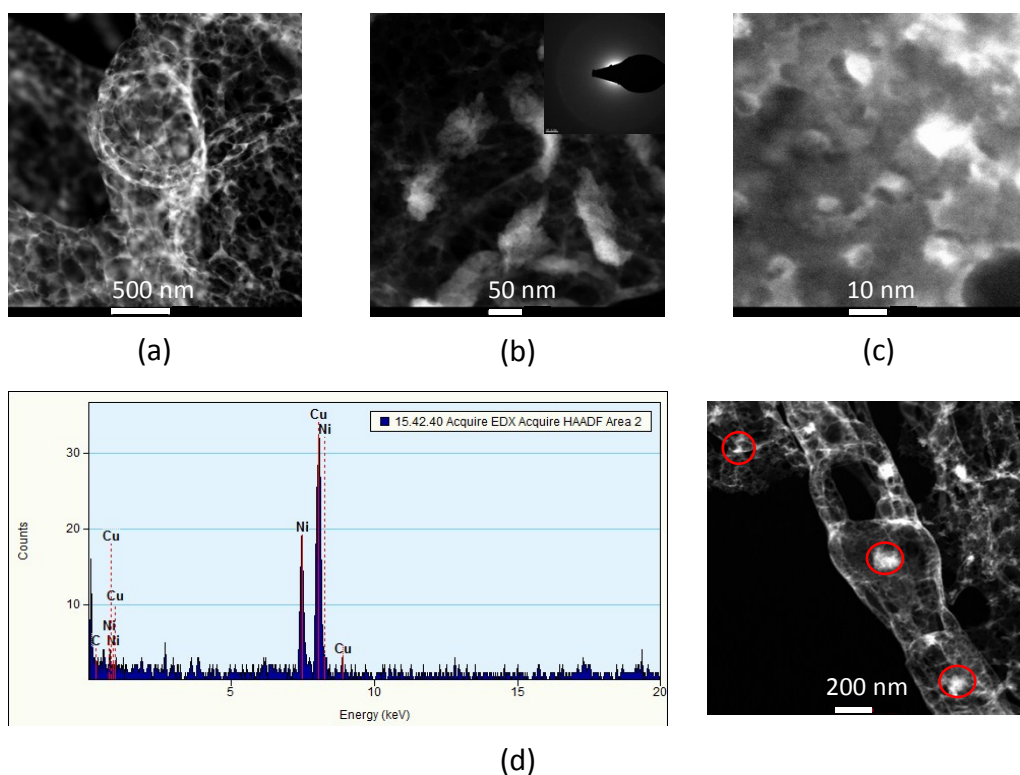

**Figure S1.** TEM images of **a-Cu@C**; a) wide view of Cu features in anisotropic carbon matrix, b) magnification of **a-Cu@C** with inset STEM derived diffuse diffraction pattern, c) magnification of **a-Cu@C** d) TEM-EDX images of **a-Cu@C** (Ni peaks are from TEM sample holder).

The catalytic activity for aerobic oxidation with TEMPO and molecular oxygen is compared between different Cu-based catalysts.

**Table S1.** Cu-catalyzed aerobic oxidation of benzyl alcohol

Reaction scheme: Benzyl alcohol (1 mmol) reacts with Cu-based catalysts (5 mol% TEMPO, 0.2 equiv. NMI) in CH<sub>3</sub>CN (1 mL) under O<sub>2</sub> at 70 °C for 9 h to yield benzaldehyde.

| Entry | Catalyst (mol%)                                | Yield <sup>b</sup> (%) | TON <sup>c</sup> | Reference |
|-------|------------------------------------------------|------------------------|------------------|-----------|
| 1     | None                                           | n.a.                   | n.a.             | This work |
| 2     | Cu-C (5.0)                                     | 94                     | 18.8             | 1         |
| 3     | Cu(I/II)-Amp-CPG (5.0)                         | 97                     | 19.4             | 2         |
| 4     | CuI + <sup>t</sup> Bu <sub>2</sub> -bipy (5.0) | 96                     | 19.2             | 3         |
| 5     | CuAAC-3a (5.0)                                 | 100                    | 20               | 4         |

<sup>a</sup> Reaction conditions: benzyl alcohol (1 mmol), TEMPO (5 mol% to benzyl alcohol), NMI (0.2 equiv.), catalyst (0.5 – 5.0 mol% to benzyl alcohol), and CH<sub>3</sub>CN (1 mL) under O<sub>2</sub> balloon, 70 °C, 9 h. <sup>b</sup> Determined by GC-MS using biphenyl as internal standard. <sup>c</sup> Turnover number (TON) = [moles of converted substrate (benzyl alcohol)] × (moles of Cu)<sup>-1</sup>.

The catalytic activity for reduction of nitroaromatic molecules is compared between different catalysts.

**Table S2.** Cu-catalyzed reduction of nitrobenzene with NaBH<sub>4</sub>

| Entry | Catalyst (mol%)      | Time (h) | Yield (%) | TON | Reference |
|-------|----------------------|----------|-----------|-----|-----------|
| 1     | <b>a-Cu@C</b> (10.0) | 2        | 87        | 8.7 | This work |
| 2     | Cu-C (50.0)          | < 1 min  | 100       | 2   | 5         |
| 3     | CuO (10.0)           | 2        | 79        | 7.9 | 6         |
| 4     | Cu NPs (10.0)        | 2        | 98        | 9.8 | 6         |
| 5     | CuNP/WS-1 (~2.12)    | 3        | 93        | 44  | 7         |

<sup>a</sup> Reaction conditions: nitrobenzene (1 mmol), NaBH<sub>4</sub> (3 equiv. to nitrobenzene), catalyst (5.0 – 50.0 mol% to nitrobenzene), and THF/H<sub>2</sub>O (1:2, 3 mL), 50 °C, 2-4 h. <sup>b</sup> Determined by GC-MS using biphenyl as internal standard. <sup>c</sup> Turnover number (TON) = [moles of converted substrate (nitrobenzene)] × (moles of Cu)<sup>-1</sup>.

The catalytic activity for N-arylation is compared between different Cu-based catalysts.

**Table S3.** Cu-catalyzed N-arylation of imidazole using iodobenzene\*

| Entry | Catalyst (mol%)                                                      | Conv. (%) | Yield <sup>b</sup> (%) | TON  | Reference |
|-------|----------------------------------------------------------------------|-----------|------------------------|------|-----------|
| 1     | None                                                                 | n.a.      | n.a.                   | n.a. | This work |
| 6     | HKUST-1 (10.0)                                                       | 85        | 85                     | 8.5  | 8         |
| 7     | Cu(II)-Fe <sub>3</sub> O <sub>4</sub> @SiO <sub>2</sub> (0.5)        | 81        | 81                     | 162  | 9         |
| 8     | Cu NPs-MCN (2.5)                                                     | 98        | 98                     | 39.2 | 10        |
| 9     | Fe <sub>3</sub> O <sub>4</sub> @SiO <sub>2</sub> /Salen-Cu(II) (0.4) | 82        | 82                     | 205  | 11        |

\*See reference 15. <sup>a</sup> Reaction conditions: iodobenzene (1 mmol), imidazole (1.2 mmol), catalyst (0.5 – 10.0 mol% to iodobenzene), KOH (1.5 mmol), DMSO (1 mL), 110 °C, 24 h. <sup>b</sup> Determined by GC-MS using biphenyl as internal standard. <sup>c</sup> Turnover number (TON) = [moles of converted substrate (iodobenzene)] × (moles of Cu)<sup>-1</sup>.

## REFERENCES

1. B. R. Kim, J. S. Oh, J. Kim and C. Y. Lee, *Catal. Lett.*, 2016, **146**, 734–743.
2. I. Ibrahim, M. N. Iqbal, O. Verho, A. Eivazihollagh, P. Olsén, H. Edlund, C.-W. Tai, M. Norgren and E. V. Johnston, *ChemNanoMat*, 2018, **4**, 71-75.
3. L. Wang, Z. Bie, S. Shang, G. Li, J. Niu and S. Gao, *ChemistrySelect*, 2018, **3**, 3386-3390.
4. P. Chandra, A. M. Jonas and A. E. Fernandes, *ACS Catal.*, 2018, **8**, 6006-6011.
5. H. Niu, S. Liu, Y. Cai, F. Wu and X. Zhao, *Microporous and Mesoporous Materials*, 2016, **219**, 48–53.
6. Z. Duan, G. Ma and W. Zhang, *Bull. Korean Chem. Soc.*, 2012, **33(12)**, 4003-4006.
7. A. Zamani, A. P. Marjani, A. Nikoo, M. Heidarpour and A. Dehghan, *Inorganic and Nano-metal chemistry*, 2018, **48(3)**, 176-181.
8. Z. Li, F. Meng, J. Zhang, J. Xie and B. Dai, *Org. Biomol. Chem.*, 2016, **14**, 10861-10865.
9. M. Esmailpour, A. R. Sardarian and H. Firouzabadi, *Appl. Organometal. Chem.*, 2018, **32(4)**, 4300.
10. S. K. Movahed, P. Salari, M. Kasmaei, M. Armaghan, M. Dabiri and M. M. Amini, *Appl. Organometal. Chem.*, 2018, **32**, 3914.
11. A. R. Sardarian, N. Zohourian-Mashmoul and M. Esmailpour, *Monatsh. Chem.*, 2018, **149**, 1101-1109.
